# Supplementary material for: The SDHD:p.H102R Variant Is Frequent in Russian Patients with Head and Neck Paragangliomas and Associated with Loss of 11p15.5 Region and Hypermethylation of H19-DMR
Source: MDPI journal article supplement (doi:10.3390/ijms24010628), 2022-12-30
Supplement: s1 [file s1]

**Table S2.** Sequences of converted DNA specific primers for differentially methylated regions (DMRs) on chromosome 11.

| <b>DMRs</b> | <b>Sequence (5'-3')</b>                                    |
|-------------|------------------------------------------------------------|
| H19-<br>DMR | F: tcgtcggcagcgtcagatgtgtataagagacagGGTTATTTTTTTGTTTGAAGAT |
|             | R: gtctcgtgggctcggagatgtgtataagagacagAATCTCCACTCCACTCCCAA  |
| KvDMR       | F: tcgtcggcagcgtcagatgtgtataagagacagTTGGTAGGATTTTGTGAGGAGT |
|             | R: gtctcgtgggctcggagatgtgtataagagacagCCCAATCAACAAATAAAAAAC |

F, forward; R, reverse. Small letters notate sequences added for adapter annealing.
