# Supplementary material for: The SDHD:p.H102R Variant Is Frequent in Russian Patients with Head and Neck Paragangliomas and Associated with Loss of 11p15.5 Region and Hypermethylation of H19-DMR
Source: MDPI journal article supplement (doi:10.3390/ijms24010628), 2022-12-30
Supplement: s1 [file s1]

**Table S1.** Sequences of primers for microsatellite analysis.

| <b>Microsatellite marker</b> | <b>Sequence (5'-3')</b>    |
|------------------------------|----------------------------|
| D11S1339                     | F: ATGGCCTTGGAAAAATATC     |
|                              | R: GGGTGTAAACCAGTTCTTCAG   |
| D11S1347                     | F: CAGCCTGGGCAATAGT        |
|                              | R: GCAGCAACAACAACAATAA     |
| D11S927                      | F: AGTGAGCCGAGTTCGC        |
|                              | R: ACCAAAAGCCTGGAATG       |
| D11S5030                     | F: CTAAAGGATTGAGTCATGCCCTT |
|                              | R: GACAAGAGTGAGACCCTGTC    |
| D11S1984                     | F: GGGTGACAGAGCAAAATTCT    |
|                              | R: ACACCTGGATCTTGGACTCA    |
| D11S4046                     | F: ACTCCAGCCTGGGAAAC       |
|                              | R: TGATAGACACACCCATTGC     |
| D11S4088                     | F: GGGCAGAGGCAGTGGAG       |
|                              | R: GCATGTTTCGGGGGTG        |
| D11S1318                     | F: CCCGTATGGCAACAGG        |
|                              | R: TGTGCATGTNCATGAGTG      |
| D11S901                      | F: CCCACATAGATTACTGGCCTC   |
|                              | R: TCCTACATTAGCAGTTGGCA    |
| D11S1313                     | F: CTAAGCATGANGCCAAGTTA    |
|                              | R: AGTTTGACATTAGGGAATTTTGA |
| D11S907                      | F: GCTTATTGTCCATACCCAAA    |
|                              | R: AAAGNACCTTAATTTTCAGGC   |
| D1S552                       | F: TTCATGCAGCATCATCCC      |
|                              | R: TGTGGGCAGGTGTAAAGAGT    |

F, forward; R, reverse.
